# Supplementary material for: Identifying Protein Features Responsible for Improved Drug Repurposing Accuracies Using the CANDO Platform: Implications for Drug Design
Source: MDPI journal article supplement (doi:10.3390/molecules24010167), 2019-01-04
Supplement: s1 [file s1]

| MeSH heading                            | MeSH ID      | Compound name                                      | #compounds approved |      | consensus score | consensus ratio |   |                |
|-----------------------------------------|--------------|----------------------------------------------------|---------------------|------|-----------------|-----------------|---|----------------|
| "Malaria, Cerebral"                     | MESH:D016779 | zosuquidar2                                        | 2                   | 1.0  |                 |                 |   |                |
| "Malaria, Cerebral"                     | MESH:D016779 | posaconazole                                       | 2                   | 2    | 1.0             |                 |   |                |
| "Malaria, Cerebral"                     | MESH:D016779 | cinchoninecomma_monohydrochloridecomma_(9s)-isomer |                     |      |                 | 2               | 2 | 1.0            |
| Malaria                                 | MESH:D008288 | cinchoninecomma_monohydrochloridecomma_(9s)-isomer |                     |      | 19              | 4               |   | 0.210526315789 |
| Malaria                                 | MESH:D008288 | quinine_ethylcarbonate                             | 19                  | 4    | 0.210526315789  |                 |   |                |
| Malaria                                 | MESH:D008288 | isothipendyl                                       | 19                  | 3    | 0.157894736842  |                 |   |                |
| Malaria                                 | MESH:D008288 | posaconazole                                       | 19                  | 3    | 0.157894736842  |                 |   |                |
| Malaria                                 | MESH:D008288 | alcaftadine                                        | 19                  | 3    | 0.157894736842  |                 |   |                |
| Malaria                                 | MESH:D008288 | zosuquidar19                                       | 3                   |      | 0.157894736842  |                 |   |                |
| Malaria                                 | MESH:D008288 | chlortetracycline                                  | 19                  | 3    | 0.157894736842  |                 |   |                |
| "Malaria, Falciparum"                   | MESH:D016778 | zosuquidar20                                       | 3                   | 0.15 |                 |                 |   |                |
| "Malaria, Falciparum"                   | MESH:D016778 | cinchoninecomma_monohydrochloridecomma_(9s)-isomer |                     |      |                 | 20              | 3 | 0.15           |
| "Malaria, Falciparum"                   | MESH:D016778 | posaconazole                                       | 20                  | 3    | 0.15            |                 |   |                |
| Malaria                                 | MESH:D008288 | furazabol                                          | 19                  | 2    | 0.105263157895  |                 |   |                |
| Malaria                                 | MESH:D008288 | methacycline                                       | 19                  | 2    | 0.105263157895  |                 |   |                |
| Malaria                                 | MESH:D008288 | clomocycline                                       | 19                  | 2    | 0.105263157895  |                 |   |                |
| Malaria                                 | MESH:D008288 | dimethylaminoethyl_reserpilinate_dihydrochloride   | 19                  | 2    |                 | 0.105263157895  |   |                |
| Malaria                                 | MESH:D008288 | danazol                                            | 19                  | 2    | 0.105263157895  |                 |   |                |
| Malaria                                 | MESH:D008288 | emedastine                                         | 19                  | 2    | 0.105263157895  |                 |   |                |
| Malaria                                 | MESH:D008288 | metacycline                                        | 19                  | 2    | 0.105263157895  |                 |   |                |
| Malaria                                 | MESH:D008288 | dapiprazole                                        | 19                  | 2    | 0.105263157895  |                 |   |                |
| Malaria                                 | MESH:D008288 | tigecycline                                        | 19                  | 2    | 0.105263157895  |                 |   |                |
| Malaria                                 | MESH:D008288 | demeclocycline                                     | 19                  | 2    | 0.105263157895  |                 |   |                |
| Malaria                                 | MESH:D008288 | clemizole_hydrochloride                            | 19                  | 2    | 0.105263157895  |                 |   |                |
| "Malaria, Falciparum"                   | MESH:D016778 | furazabol                                          | 20                  | 2    | 0.1             |                 |   |                |
| "Malaria, Falciparum"                   | MESH:D016778 | sulfamethoxazole                                   | 20                  | 2    | 0.1             |                 |   |                |
| "Malaria, Falciparum"                   | MESH:D016778 | pemetrexed                                         | 20                  | 2    | 0.1             |                 |   |                |
| "Malaria, Falciparum"                   | MESH:D016778 | tetrahydrofolic_acid                               | 20                  | 2    | 0.1             |                 |   |                |
| "Malaria, Falciparum"                   | MESH:D016778 | dimethylaminoethyl_reserpilinate_dihydrochloride   |                     |      |                 | 20              | 2 | 0.1            |
| "Malaria, Falciparum"                   | MESH:D016778 | danazol                                            | 20                  | 2    | 0.1             |                 |   |                |
| "Malaria, Falciparum"                   | MESH:D016778 | sinophenin                                         | 20                  | 2    | 0.1             |                 |   |                |
| "Malaria, Falciparum"                   | MESH:D016778 | isothipendyl                                       | 20                  | 2    | 0.1             |                 |   |                |
| "Malaria, Falciparum"                   | MESH:D016778 | quinine_ethylcarbonate                             | 20                  | 2    | 0.1             |                 |   |                |
| "Malaria, Falciparum"                   | MESH:D016778 | sulfametomidine                                    | 20                  | 2    | 0.1             |                 |   |                |
| "Malaria, Falciparum"                   | MESH:D016778 | alcaftadine                                        | 20                  | 2    | 0.1             |                 |   |                |
| "Malaria, Falciparum"                   | MESH:D016778 | levomefolic                                        | 20                  | 2    | 0.1             |                 |   |                |
| "Malaria, Falciparum"                   | MESH:D016778 | raltitrexed                                        | 20                  | 2    | 0.1             |                 |   |                |
| "Malaria, Falciparum"                   | MESH:D016778 | clemizole_hydrochloride                            | 20                  | 2    | 0.1             |                 |   |                |
| "Malaria, Falciparum"                   | MESH:D016778 | pemetrexed_disodium                                | 20                  | 2    | 0.1             |                 |   |                |
| Extensively Drug-Resistant Tuberculosis | MESH:D054908 | phenolphthalein                                    |                     |      |                 | 3               | 2 | 0.666666666667 |
| "Tuberculosis, Meningeal"               | MESH:D014390 | nicogamol                                          | 4                   | 2    | 0.5             |                 |   |                |
| "Tuberculosis, Meningeal"               | MESH:D014390 | pyrazinoic_acid                                    | 4                   | 2    | 0.5             |                 |   |                |
| "Tuberculosis, Meningeal"               | MESH:D014390 | nicotinic_acid                                     | 4                   | 2    | 0.5             |                 |   |                |
| "Tuberculosis, Meningeal"               | MESH:D014390 | methaniazide                                       | 4                   | 2    | 0.5             |                 |   |                |
| "Tuberculosis, Meningeal"               | MESH:D014390 | dacarbazine                                        | 4                   | 2    | 0.5             |                 |   |                |
| "Tuberculosis, Lymph Node"              | MESH:D014388 | nicogamol                                          | 5                   | 2    | 0.4             |                 |   |                |
| "Tuberculosis, Lymph Node"              | MESH:D014388 | pyrazinoic_acid                                    | 5                   | 2    | 0.4             |                 |   |                |
| "Tuberculosis, Lymph Node"              | MESH:D014388 | nicotinic_acid                                     | 5                   | 2    | 0.4             |                 |   |                |
| "Tuberculosis, Lymph Node"              | MESH:D014388 | methaniazide                                       | 5                   | 2    | 0.4             |                 |   |                |
| "Tuberculosis, Lymph Node"              | MESH:D014388 | dacarbazine                                        | 5                   | 2    | 0.4             |                 |   |                |
| "Tuberculosis, Central Nervous System"  | MESH:D020306 | nicogamol                                          | 5                   | 2    | 0.4             |                 |   |                |
| "Tuberculosis, Central Nervous System"  | MESH:D020306 | pyrazinoic_acid                                    | 5                   | 2    |                 | 0.4             |   |                |
| "Tuberculosis, Central Nervous System"  | MESH:D020306 | nicotinic_acid                                     | 5                   | 2    |                 | 0.4             |   |                |
| "Tuberculosis, Central Nervous System"  | MESH:D020306 | methaniazide                                       | 5                   | 2    |                 | 0.4             |   |                |
| "Tuberculosis, Central Nervous System"  | MESH:D020306 | dacarbazine                                        | 5                   | 2    |                 | 0.4             |   |                |
| "Tuberculosis, Spinal"                  | MESH:D014399 | nicogamol                                          | 6                   | 2    | 0.333333333333  |                 |   |                |
| "Tuberculosis, Spinal"                  | MESH:D014399 | pyrazinoic_acid                                    | 6                   | 2    | 0.333333333333  |                 |   |                |
| "Tuberculosis, Spinal"                  | MESH:D014399 | nicotinic_acid                                     | 6                   | 2    | 0.333333333333  |                 |   |                |
| "Tuberculosis, Spinal"                  | MESH:D014399 | methaniazide                                       | 6                   | 2    | 0.333333333333  |                 |   |                |
| "Tuberculosis, Spinal"                  | MESH:D014399 | dacarbazine                                        | 6                   | 2    | 0.333333333333  |                 |   |                |
| "Tuberculosis, Multidrug-Resistant"     | MESH:D018088 | phenolphthalein                                    |                     |      |                 | 13              | 3 | 0.230769230769 |
| "Tuberculosis, Pulmonary"               | MESH:D014397 | azithromycin                                       | 11                  | 2    | 0.181818181818  |                 |   |                |
| "Tuberculosis, Pulmonary"               | MESH:D014397 | erythromyclamine                                   | 11                  | 2    | 0.181818181818  |                 |   |                |
| "Tuberculosis, Pulmonary"               | MESH:D014397 | methacycline                                       | 11                  | 2    | 0.181818181818  |                 |   |                |
| "Tuberculosis, Pulmonary"               | MESH:D014397 | pyrazinoic_acid                                    | 11                  | 2    | 0.181818181818  |                 |   |                |

|                                     |              |                                                        |    |   |                |   |
|-------------------------------------|--------------|--------------------------------------------------------|----|---|----------------|---|
| "Tuberculosis, Pulmonary"           | MESH:D014397 | rifapentine                                            | 11 | 2 | 0.181818181818 |   |
| "Tuberculosis, Pulmonary"           | MESH:D014397 | roxithromycin                                          | 11 | 2 | 0.181818181818 |   |
| "Tuberculosis, Pulmonary"           | MESH:D014397 | dacarbazine                                            | 11 | 2 | 0.181818181818 |   |
| "Tuberculosis, Pulmonary"           | MESH:D014397 | nicogamol                                              | 11 | 2 | 0.181818181818 |   |
| "Tuberculosis, Pulmonary"           | MESH:D014397 | nicotinic_acid                                         | 11 | 2 | 0.181818181818 |   |
| "Tuberculosis, Pulmonary"           | MESH:D014397 | methaniazide                                           | 11 | 2 | 0.181818181818 |   |
| "Tuberculosis, Pulmonary"           | MESH:D014397 | rifampicin                                             | 11 | 2 | 0.181818181818 |   |
| "Tuberculosis, Pulmonary"           | MESH:D014397 | chlortetracycline                                      | 11 | 2 | 0.181818181818 |   |
| "Tuberculosis, Multidrug-Resistant" | MESH:D018088 | diflunisal                                             | 13 | 2 | 0.153846153846 |   |
| "Tuberculosis, Multidrug-Resistant" | MESH:D018088 | balofloxacin                                           | 13 | 2 | 0.153846153846 |   |
| "Tuberculosis, Multidrug-Resistant" | MESH:D018088 | oxibendazole                                           | 13 | 2 | 0.153846153846 |   |
| "Tuberculosis, Multidrug-Resistant" | MESH:D018088 | nicotinic_acid                                         | 13 | 2 | 0.153846153846 |   |
| "Tuberculosis, Multidrug-Resistant" | MESH:D018088 | pyrazinoic_acid                                        | 13 | 2 | 0.153846153846 |   |
| "Tuberculosis, Multidrug-Resistant" | MESH:D018088 | lomefloxacin                                           | 13 | 2 | 0.153846153846 |   |
| "Tuberculosis, Multidrug-Resistant" | MESH:D018088 | besifloxacin                                           | 13 | 2 | 0.153846153846 |   |
| "Tuberculosis, Multidrug-Resistant" | MESH:D018088 | enrofloxacin                                           | 13 | 2 | 0.153846153846 |   |
| "Tuberculosis, Multidrug-Resistant" | MESH:D018088 | orbifloxacin                                           | 13 | 2 | 0.153846153846 |   |
| "Tuberculosis, Multidrug-Resistant" | MESH:D018088 | dacarbazine                                            | 13 | 2 | 0.153846153846 |   |
| "Tuberculosis, Multidrug-Resistant" | MESH:D018088 | nicogamol                                              | 13 | 2 | 0.153846153846 |   |
| "Tuberculosis, Multidrug-Resistant" | MESH:D018088 | methaniazide                                           | 13 | 2 | 0.153846153846 |   |
| "Tuberculosis, Multidrug-Resistant" | MESH:D018088 | sodium_thiosalicilate                                  | 13 | 2 | 0.153846153846 |   |
| Tuberculosis                        | MESH:D014376 | balofloxacin                                           | 18 | 2 | 0.111111111111 |   |
| Tuberculosis                        | MESH:D014376 | lomefloxacin                                           | 18 | 2 | 0.111111111111 |   |
| Tuberculosis                        | MESH:D014376 | cefalexin                                              | 18 | 2 | 0.111111111111 |   |
| Tuberculosis                        | MESH:D014376 | oxibendazole                                           | 18 | 2 | 0.111111111111 |   |
| Tuberculosis                        | MESH:D014376 | nicotinic_acid                                         | 18 | 2 | 0.111111111111 |   |
| Tuberculosis                        | MESH:D014376 | pyrazinoic_acid                                        | 18 | 2 | 0.111111111111 |   |
| Tuberculosis                        | MESH:D014376 | enrofloxacin                                           | 18 | 2 | 0.111111111111 |   |
| Tuberculosis                        | MESH:D014376 | besifloxacin                                           | 18 | 2 | 0.111111111111 |   |
| Tuberculosis                        | MESH:D014376 | lenampicillin                                          | 18 | 2 | 0.111111111111 |   |
| Tuberculosis                        | MESH:D014376 | orbifloxacin                                           | 18 | 2 | 0.111111111111 |   |
| Tuberculosis                        | MESH:D014376 | dacarbazine                                            | 18 | 2 | 0.111111111111 |   |
| Tuberculosis                        | MESH:D014376 | norfloxacin                                            | 18 | 2 | 0.111111111111 |   |
| Tuberculosis                        | MESH:D014376 | nicogamol                                              | 18 | 2 | 0.111111111111 |   |
| Tuberculosis                        | MESH:D014376 | methaniazide                                           | 18 | 2 | 0.111111111111 |   |
| Tuberculosis                        | MESH:D014376 | bacampicillin                                          | 18 | 2 | 0.111111111111 |   |
| "Carcinoma, Large Cell"             | MESH:D018287 | guanadrel                                              | 6  | 2 | 0.333333333333 |   |
| "Carcinoma, Large Cell"             | MESH:D018287 | 4-hydroxycyclophosphamide                              | 6  | 2 | 0.333333333333 |   |
| "Carcinoma, Large Cell"             | MESH:D018287 | 2-(2-diethylaminoethoxy)ethyl_2-ethyl-2-phenylbutyrate | 6  | 2 | 0.333333333333 | 2 |
| "Carcinoma, Large Cell"             | MESH:D018287 | sobuzoxane                                             | 6  | 2 | 0.333333333333 |   |
| "Carcinoma, Large Cell"             | MESH:D018287 | exametazime                                            | 6  | 2 | 0.333333333333 |   |
| "Carcinoma, Large Cell"             | MESH:D018287 | pentoxifyverine                                        | 6  | 2 | 0.333333333333 |   |
| "Carcinoma, Large Cell"             | MESH:D018287 | guanadrel_sulfate                                      | 6  | 2 | 0.333333333333 |   |
| "Carcinoma, Large Cell"             | MESH:D018287 | cycloserine                                            | 6  | 2 | 0.333333333333 |   |
| "Carcinoma, Large Cell"             | MESH:D018287 | fosfomycin                                             | 6  | 2 | 0.333333333333 |   |
