# Supplementary material for: Identifying Protein Features Responsible for Improved Drug Repurposing Accuracies Using the CANDO Platform: Implications for Drug Design
Source: MDPI journal article supplement (doi:10.3390/molecules24010167), 2019-01-04
Supplement: s1 [file s1]

| Approved drug name                                     | CANDO ID | MeSH heading                           | MeSH ID      |                       |              |
|--------------------------------------------------------|----------|----------------------------------------|--------------|-----------------------|--------------|
| 1-(4-chlorophenyl)-5-isopropyl-biguanide_hydrochloride |          |                                        | 1663         | Malaria               | MESH:D008288 |
| 1-(4-chlorophenyl)-5-isopropyl-biguanide_hydrochloride |          |                                        | 1663         | "Malaria, Falciparum" | MESH:D016778 |
| amodiaquine                                            | 2259     | "Malaria, Falciparum"                  | MESH:D016778 |                       |              |
| amodiaquine                                            | 2259     | Malaria                                | MESH:D008288 |                       |              |
| artesunate 891                                         |          | Malaria                                | MESH:D008288 |                       |              |
| artesunate 891                                         |          | "Malaria, Falciparum"                  | MESH:D016778 |                       |              |
| astemizole 1938                                        |          | Malaria                                | MESH:D008288 |                       |              |
| atovaquone                                             | 1619     | Malaria                                | MESH:D008288 |                       |              |
| azlocillin 1837                                        |          | "Malaria, Falciparum"                  | MESH:D016778 |                       |              |
| chlorprothixene                                        | 1092     | "Malaria, Falciparum"                  | MESH:D016778 |                       |              |
| ciprofloxacin                                          | 2662     | Malaria                                | MESH:D008288 |                       |              |
| clindamycin                                            | 293      | "Malaria, Falciparum"                  | MESH:D016778 |                       |              |
| cloquinate 2471                                        |          | "Malaria, Falciparum"                  | MESH:D016778 |                       |              |
| cloquinate 2471                                        |          | Malaria                                | MESH:D008288 |                       |              |
| cloquinate 2471                                        |          | "Malaria, Vivax"                       | MESH:D016780 |                       |              |
| clotrimazole                                           | 185      | "Malaria, Falciparum"                  | MESH:D016778 |                       |              |
| dapsone 526                                            |          | Malaria                                | MESH:D008288 |                       |              |
| dapsone 526                                            |          | "Malaria, Falciparum"                  | MESH:D016778 |                       |              |
| doxycycline                                            | 1439     | Malaria                                | MESH:D008288 |                       |              |
| folic_acid 1886                                        |          | "Malaria, Falciparum"                  | MESH:D016778 |                       |              |
| halofantrinum                                          | 763      | Malaria                                | MESH:D008288 |                       |              |
| halofantrinum                                          | 763      | "Malaria, Falciparum"                  | MESH:D016778 |                       |              |
| hydrochloridecomma_thioridazin                         |          |                                        | 2142         | "Malaria, Falciparum" | MESH:D016778 |
| hydroxychloroquine                                     | 2306     | Malaria                                | MESH:D008288 |                       |              |
| leucovorin 1741                                        |          | "Malaria, Falciparum"                  | MESH:D016778 |                       |              |
| lumefantrine                                           | 1211     | Malaria                                | MESH:D008288 |                       |              |
| mefloquine                                             | 1591     | "Malaria, Vivax"                       | MESH:D016780 |                       |              |
| mefloquine                                             | 1591     | "Malaria, Falciparum"                  | MESH:D016778 |                       |              |
| mefloquine                                             | 1591     | Malaria                                | MESH:D008288 |                       |              |
| mefloquine                                             | 1591     | "Malaria, Cerebral"                    | MESH:D016779 |                       |              |
| primaquine                                             | 1525     | "Malaria, Vivax"                       | MESH:D016780 |                       |              |
| primaquine                                             | 1525     | Malaria                                | MESH:D008288 |                       |              |
| propafenone                                            | 2442     | "Malaria, Falciparum"                  | MESH:D016778 |                       |              |
| pyrimethamine                                          | 1233     | Malaria                                | MESH:D008288 |                       |              |
| pyrimethamine                                          | 1233     | "Malaria, Falciparum"                  | MESH:D016778 |                       |              |
| quinidine 1754                                         |          | "Malaria, Falciparum"                  | MESH:D016778 |                       |              |
| quinidine 1754                                         |          | Malaria                                | MESH:D008288 |                       |              |
| quinine 1751                                           |          | "Malaria, Cerebral"                    | MESH:D016779 |                       |              |
| quinine 1751                                           |          | Malaria                                | MESH:D008288 |                       |              |
| quinine 1751                                           |          | "Malaria, Falciparum"                  | MESH:D016778 |                       |              |
| sulfadoxine                                            | 1159     | "Malaria, Falciparum"                  | MESH:D016778 |                       |              |
| sulfadoxine                                            | 1159     | Malaria                                | MESH:D008288 |                       |              |
| sulfafurazole                                          | 1763     | "Malaria, Falciparum"                  | MESH:D016778 |                       |              |
| tetracycline                                           | 159      | Malaria                                | MESH:D008288 |                       |              |
| 3-ethyl-thio-isonicotamide                             | 438      | Tuberculosis                           | MESH:D014376 |                       |              |
| 3-ethyl-thio-isonicotamide                             | 438      | "Tuberculosis, Multidrug-Resistant"    |              | MESH:D018088          |              |
| acidscomma_aminosalicyli                               | 1245     | Tuberculosis                           | MESH:D014376 |                       |              |
| acidscomma_aminosalicyli                               | 1245     | "Tuberculosis, Multidrug-Resistant"    |              | MESH:D018088          |              |
| amikacin 2645                                          |          | Tuberculosis                           | MESH:D014376 |                       |              |
| bekanamycin                                            | 2290     | Tuberculosis                           | MESH:D014376 |                       |              |
| bekanamycin                                            | 2290     | "Tuberculosis, Multidrug-Resistant"    |              | MESH:D018088          |              |
| capreomycin                                            | 2028     | "Tuberculosis, Pulmonary"              | MESH:D014397 |                       |              |
| capreomycin                                            | 2028     | Tuberculosis                           | MESH:D014376 |                       |              |
| capreomycin                                            | 2028     | "Tuberculosis, Multidrug-Resistant"    |              | MESH:D018088          |              |
| chenodiol 1750                                         |          | Tuberculosis                           | MESH:D014376 |                       |              |
| ciprofloxacin                                          | 2662     | Tuberculosis                           | MESH:D014376 |                       |              |
| ciprofloxacin                                          | 2662     | "Tuberculosis, Spinal"                 | MESH:D014399 |                       |              |
| clarithromycin                                         | 825      | "Tuberculosis, Pulmonary"              | MESH:D014397 |                       |              |
| cycloserine                                            | 1706     | Tuberculosis                           | MESH:D014376 |                       |              |
| cycloserine                                            | 1706     | "Tuberculosis, Multidrug-Resistant"    |              | MESH:D018088          |              |
| cycloserine                                            | 1706     | "Tuberculosis, Pulmonary"              | MESH:D014397 |                       |              |
| ethambutol                                             | 386      | Tuberculosis                           | MESH:D014376 |                       |              |
| ethambutol                                             | 386      | "Tuberculosis, Central Nervous System" |              | MESH:D020306          |              |
| ethambutol                                             | 386      | "Tuberculosis, Lymph Node"             | MESH:D014388 |                       |              |
| ethambutol                                             | 386      | "Tuberculosis, Multidrug-Resistant"    |              | MESH:D018088          |              |

|                           |      |                                         |              |
|---------------------------|------|-----------------------------------------|--------------|
| ethambutol                | 386  | "Tuberculosis, Pulmonary"               | MESH:D014397 |
| ethambutol                | 386  | "Tuberculosis, Spinal"                  | MESH:D014399 |
| gatifloxacin              | 1371 | "Tuberculosis, Multidrug-Resistant"     | MESH:D018088 |
| linezolid                 | 1521 | Extensively Drug-Resistant Tuberculosis | MESH:D054908 |
| ofloxacin                 | 1704 | "Tuberculosis, Pulmonary"               | MESH:D014397 |
| ofloxacin                 | 1704 | "Tuberculosis, Multidrug-Resistant"     | MESH:D018088 |
| ofloxacin                 | 1704 | "Tuberculosis, Lymph Node"              | MESH:D014388 |
| ofloxacin                 | 1704 | Tuberculosis                            | MESH:D014376 |
| orion_brand_of_entacapone | 1862 | "Tuberculosis, Multidrug-Resistant"     | MESH:D018088 |
| orion_brand_of_entacapone | 1862 | Extensively Drug-Resistant Tuberculosis | MESH:D054908 |
| pasiniazid                | 282  | "Tuberculosis, Multidrug-Resistant"     | MESH:D018088 |
| pasiniazid                | 282  | Tuberculosis                            | MESH:D014376 |
| pasiniazid                | 282  | "Tuberculosis, Pulmonary"               | MESH:D014397 |
| pasiniazid                | 282  | "Tuberculosis, Spinal"                  | MESH:D014399 |
| pasiniazid                | 282  | "Tuberculosis, Meningeal"               | MESH:D014390 |
| pasiniazid                | 282  | "Tuberculosis, Lymph Node"              | MESH:D014388 |
| pasiniazid                | 282  | "Tuberculosis, Central Nervous System"  | MESH:D020306 |
| prednisolone              | 2615 | Tuberculosis                            | MESH:D014376 |
| pyrazinamidum             | 1284 | "Tuberculosis, Spinal"                  | MESH:D014399 |
| pyrazinamidum             | 1284 | "Tuberculosis, Multidrug-Resistant"     | MESH:D018088 |
| pyrazinamidum             | 1284 | "Tuberculosis, Pulmonary"               | MESH:D014397 |
| pyrazinamidum             | 1284 | Tuberculosis                            | MESH:D014376 |
| pyrazinamidum             | 1284 | "Tuberculosis, Lymph Node"              | MESH:D014388 |
| pyrazinamidum             | 1284 | "Tuberculosis, Central Nervous System"  | MESH:D020306 |
| pyrazinamidum             | 1284 | "Tuberculosis, Meningeal"               | MESH:D014390 |
| pyridofylline             | 2020 | Tuberculosis                            | MESH:D014376 |
| pyridofylline             | 2020 | "Tuberculosis, Pulmonary"               | MESH:D014397 |
| rifabutin                 | 302  | "Tuberculosis, Pulmonary"               | MESH:D014397 |
| rifampin                  | 1888 | "Tuberculosis, Pulmonary"               | MESH:D014397 |
| rifampin                  | 1888 | "Tuberculosis, Spinal"                  | MESH:D014399 |
| rifampin                  | 1888 | "Tuberculosis, Multidrug-Resistant"     | MESH:D018088 |
| rifampin                  | 1888 | "Tuberculosis, Meningeal"               | MESH:D014390 |
| rifampin                  | 1888 | "Tuberculosis, Central Nervous System"  | MESH:D020306 |
| rifampin                  | 1888 | Tuberculosis                            | MESH:D014376 |
| rifampin                  | 1888 | "Tuberculosis, Lymph Node"              | MESH:D014388 |
| streptomycin              | 1719 | Tuberculosis                            | MESH:D014376 |
| streptomycin              | 1719 | "Tuberculosis, Pulmonary"               | MESH:D014397 |
| streptomycin              | 1719 | "Tuberculosis, Meningeal"               | MESH:D014390 |
| streptomycin              | 1719 | "Tuberculosis, Central Nervous System"  | MESH:D020306 |
| streptomycin              | 1719 | "Tuberculosis, Spinal"                  | MESH:D014399 |
| tasmar                    | 2145 | Extensively Drug-Resistant Tuberculosis | MESH:D054908 |
| tasmar                    | 2145 | "Tuberculosis, Multidrug-Resistant"     | MESH:D018088 |
| tretinoin                 | 1504 | Tuberculosis                            | MESH:D014376 |
| viomycin                  | 2599 | Tuberculosis                            | MESH:D014376 |
| adenosine_triphosphate    | 1637 | "Carcinoma, Large Cell"                 | MESH:D018287 |
| cyclophosphamide          | 2001 | "Carcinoma, Large Cell"                 | MESH:D018287 |
| gemcitabine               | 1005 | "Carcinoma, Large Cell"                 | MESH:D018287 |
| ifosfamide                | 811  | "Carcinoma, Large Cell"                 | MESH:D018287 |
| paclitaxel                | 776  | "Carcinoma, Large Cell"                 | MESH:D018287 |
| vinorelbine               | 1075 | "Carcinoma, Large Cell"                 | MESH:D018287 |
